1     **A simulation-based approach for estimating the time-dependent reproduction number**  
2                     **from temporally aggregated disease incidence time series data**

3             I Ogi-Gittins<sup>1,2</sup>, WS Hart<sup>3</sup>, J Song<sup>4</sup>, RK Nash<sup>5</sup>, J Polonsky<sup>6</sup>, A Cori<sup>5</sup>, EM Hill<sup>1,2</sup>, RN  
4                                             Thompson<sup>3\*</sup>

5     **Affiliations:**

6     <sup>1</sup>Mathematics Institute, University of Warwick, Coventry, CV4 7AL, UK

7     <sup>2</sup>Zeeman Institute for Systems Biology and Infectious Disease Epidemiology Research  
8     (SBIDER), University of Warwick, Coventry, CV4 7AL, UK

9     <sup>3</sup>Mathematical Institute, University of Oxford, Oxford, OX2 6GG, UK

10    <sup>4</sup>Communicable Disease Surveillance Centre, Health Protection Division, Public Health  
11    Wales, Swansea, SA2 8QA, UK

12    <sup>5</sup>MRC Centre for Global Infectious Disease Analysis, School of Public Health, Imperial  
13    College, London, W2 1PG, UK

14    <sup>6</sup>Geneva Centre of Humanitarian Studies, University of Geneva, Geneva, 1205, Switzerland

15

16    \*Correspondence to: [robin.thompson@maths.ox.ac.uk](mailto:robin.thompson@maths.ox.ac.uk)

17

## **Abstract**

18 Tracking pathogen transmissibility during infectious disease outbreaks is essential for  
19 assessing the effectiveness of public health measures and planning future control strategies. A  
20 key measure of transmissibility is the time-dependent reproduction number, which has been  
21 estimated in real-time during outbreaks of a range of pathogens from disease incidence time  
22 series data. While commonly used approaches for estimating the time-dependent reproduction  
23 number can be reliable when disease incidence is recorded frequently, such incidence data are  
24 often aggregated temporally (for example, numbers of cases may be reported weekly rather  
25 than daily). As we show, commonly used methods for estimating transmissibility can be  
26 unreliable when the timescale of transmission is shorter than the timescale of data recording.  
27 To address this, here we develop a simulation-based approach involving Approximate  
28 Bayesian Computation for estimating the time-dependent reproduction number from  
29 temporally aggregated disease incidence time series data. We first use a simulated dataset  
30 representative of a situation in which daily disease incidence data are unavailable and only  
31 weekly summary values are reported, demonstrating that our method provides accurate  
32 estimates of the time-dependent reproduction number under those circumstances. We then  
33 apply our method to two previous outbreak datasets consisting of weekly influenza case  
34 numbers from 2019-20 and 2022-23 in Wales (in the United Kingdom). Our simple-to-use  
35 approach allows more accurate estimates of time-dependent reproduction numbers to be  
36 obtained during future infectious disease outbreaks.

37

38 Keywords: Mathematical modelling, Infectious disease epidemiology, Reproduction number,  
39 Parameter inference, Serial interval, Approximate Bayesian Computation, EpiEstim,  
40 Influenza, Disease incidence

41

## **Introduction**

42 An important challenge for policy makers during infectious disease outbreaks is to devise  
43 public health measures that limit transmission without placing an undue burden on the  
44 population [1–3]. Central to the decision making process is an ability to monitor changes in  
45 pathogen transmissibility in real-time during outbreaks, to determine whether current  
46 interventions are sufficient or whether additional restrictions are required.

47 A widely used measure of transmissibility is the time-dependent reproduction number ( $R_t$ )  
48 [4–10]. The value of  $R_t$  represents the expected number of infections generated by someone  
49 infected at time  $t$  over the course of their entire infectious period. This quantity changes  
50 during an outbreak in response to interventions, variations in host behaviour and depletion of  
51 susceptible individuals due to infection-induced immunity. If the value of  $R_t$  is (and remains)  
52 below one, then the outbreak will decline. On the other hand, if the value of  $R_t$  is (and  
53 remains) above one, then the outbreak will grow.

54 Two distinct versions of  $R_t$  exist. First, the “instantaneous” reproduction number [4,5,11–13]  
55 represents the expected number of infections generated by someone infected at time  $t$  over  
56 their infectious period if transmission conditions do not change in future (i.e. assuming that  
57 the control interventions in place at time  $t$ , and any other factors that affect transmission, are  
58 not altered after time  $t$ ). Second, the “case” reproduction number [12,14] is an analogous  
59 quantity but accounts for changes in transmissibility that occur after time  $t$  (due to, for  
60 example, changes in public health policy). Methods exist for estimating each of these  
61 versions of  $R_t$  [15]. However, here we focus on the instantaneous reproduction number as it  
62 is more amenable to analyses conducted in real-time during outbreaks when future changes in  
63 pathogen transmissibility are unlikely to be known. We therefore refer to the instantaneous  
64 reproduction number as  $R_t$  in this article.

65 A commonly used approach for estimating  $R_t$  is the method introduced by Cori *et al.* [4]  
66 (hereafter referred to as the Cori method), implemented in the R software package *EpiEstim*  
67 [16] and the online application *EpiEstim App* [17]. This approach is based on a renewal  
68 equation model of pathogen transmission (see Methods) and involves estimation of  $R_t$  from  
69 disease incidence time series and an estimate of the serial interval distribution (the probability  
70 distribution characterising the interval between symptom onset times in infector-infectee  
71 transmission pairs), both on a daily timescale. The Cori method has been extended in a range  
72 of ways following its original development [7], including accounting for imported cases  
73 [5,11,18,19], uncertainty in the serial interval distribution [5], superspreading [20,21],  
74 multiple pathogen variants [22] and unobserved generations of transmission [23].

75 However, a challenge that besets estimation of  $R_t$  using the Cori method is temporal  
76 aggregation of disease incidence time series data [7,24]. For COVID-19, for example, many  
77 public health agencies switched from publishing daily numbers of reported cases to weekly  
78 summaries after the height of the pandemic [25]. Often, disease incidence is reported weekly  
79 even for pathogens including influenza [26] for which realised serial intervals and generation  
80 times are typically only a few days [27–29]. A common workaround when using the Cori  
81 method in these scenarios is to match the timescale of the serial interval distribution to the  
82 timescale of the incidence data; for example, by supplying a weekly serial interval  
83 distribution and applying the Cori method to weekly incidence data. This is problematic not  
84 only because it is hard to unpick within-week changes in pathogen transmissibility when data  
85 are reported weekly, but also because an assumption of the transmission model underlying the  
86 Cori method is that all cases arising at timestep  $t$  are generated by infectors from earlier  
87 timesteps. In other words, if the Cori method is applied with a weekly timestep, as considered  
88 in this study, then it is assumed that an infector and infectee cannot both appear as cases in  
89 the disease incidence data in the same week. As the timescale of transmission (as

90 characterised by the serial interval or generation time) of many pathogens is less than one  
91 week, this assumption is often incorrect when considering weekly aggregated disease  
92 incidence time series data.

93 In this research article, we address this issue by presenting a novel simulation-based method  
94 for estimating  $R_t$  from temporally aggregated disease incidence time series data and the serial  
95 interval distribution. Our approach involves repeated simulation of a renewal equation  
96 transmission model for different values of  $R_t$  with a timestep that is smaller than that of the  
97 disease incidence data. Using an iterative version of Approximate Bayesian Computation  
98 (ABC), we show how  $R_t$  can be estimated in real-time during outbreaks by matching model  
99 simulations exactly to the temporally aggregated outbreak data. We apply our approach to  
100 simulated data, demonstrating its accuracy and comparing results from our method to those  
101 obtained using the common workaround of the Cori method applied to temporally aggregated  
102 data. We go on to apply our method to real-world outbreak data from the 2019-20 and 2022-  
103 23 influenza seasons in Wales in the United Kingdom.

## 104 Methods

105 In our analyses, we consider two possible approaches for estimating  $R_t$  from temporally  
106 aggregated disease incidence time series data: a workaround of the widely used Cori method  
107 (Approach 1 in Fig 1) and our novel simulation-based method (Approach 2 in Fig 1). Since  
108 the simulation-based approach uses a shorter timestep than that of data reporting, this method  
109 accounts for the possibility of multiple generations of transmission occurring between dates  
110 of data reporting. To provide a concrete setting in which to compare the two methods, we  
111 focus on a situation in which disease incidence data are aggregated into weekly timesteps.  
112 Below, we describe how the value of  $R_t$  each week can be estimated from the weekly data,  
113 first using the Cori method (with a timestep of one week, since the incidence data are

114 aggregated into weekly values), and then using our simulation-based approach (using a  
 115 timestep shorter than one week, again using the weekly incidence data).

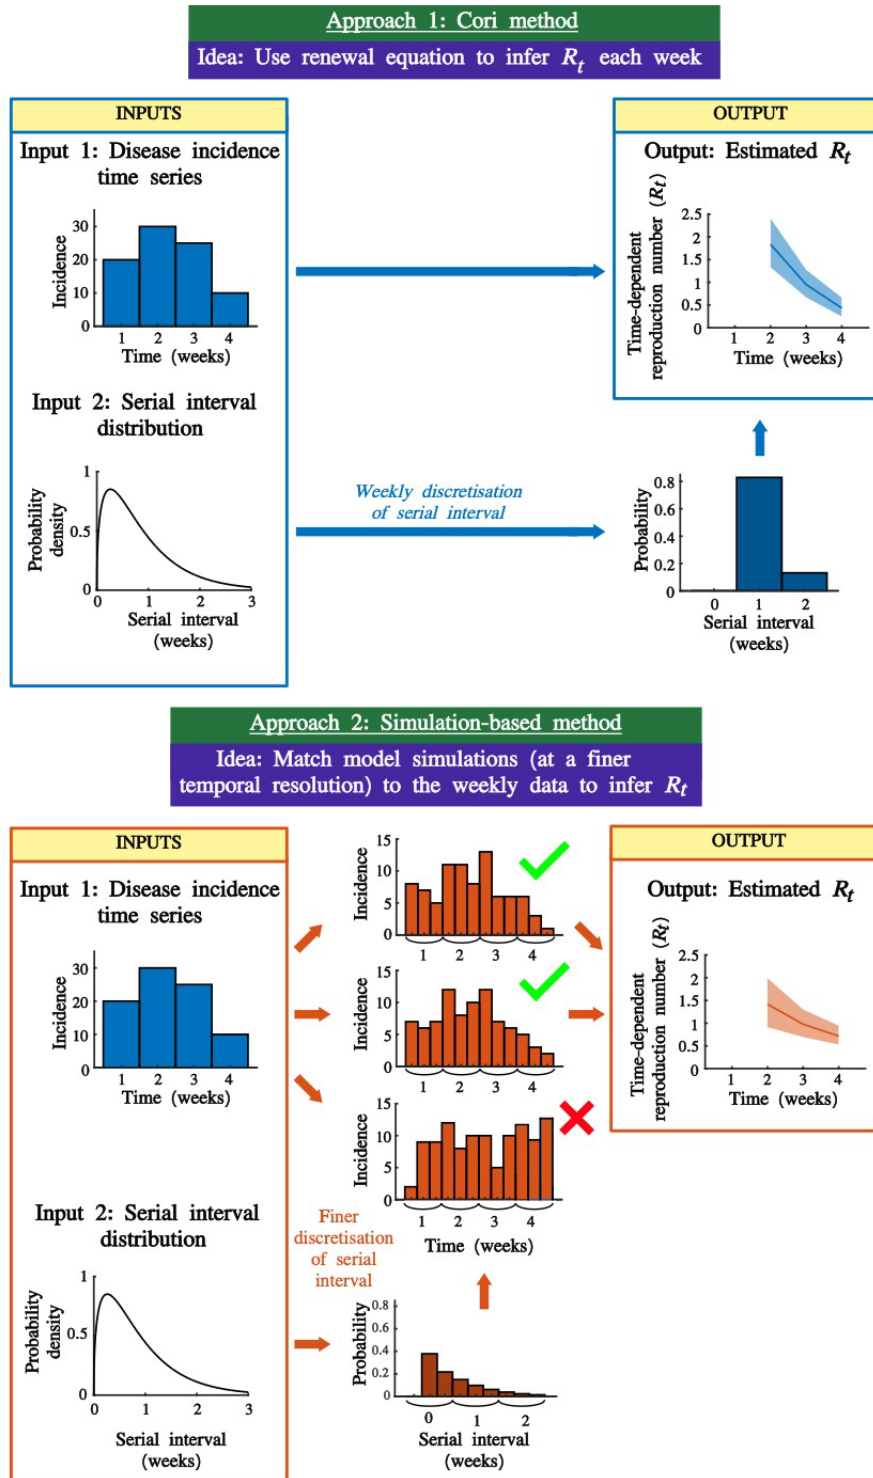

116

117 **Figure 1. Schematic illustrating the approaches for estimating  $R_t$  that we consider.** Approach 1 (top)

118 involves the application of the commonly used Cori method to weekly aggregated disease incidence time series.

119 Approach 2 (bottom) is the novel simulation-based approach, which involves matching simulations run with a  
120 smaller timestep to the weekly aggregated data to estimate  $R_t$ . The second approach relaxes the assumption that  
121 individuals appearing in the incidence data cannot have infected other individuals appearing in the same week.  
122 Relaxing this assumption is particularly important during outbreaks in which the timescale of transmission is  
123 shorter than the temporal aggregation of the data (e.g. if disease incidence time series data are aggregated  
124 weekly, but serial intervals or generation times can be shorter than one week).

125

## 126 The Cori method

127 Following previous descriptions of the Cori method [4,5,11], we assume that the expected  
128 number of cases,  $I_t$ , in week  $t$ , is given by

$$129 \quad \mathbb{E}(I_t | \{I_k\}_{k=1}^{t-1}, R_t, \mathbf{w}) = R_t \sum_{s=1}^{t-1} w_s I_{t-s}, \quad (1)$$

130 in which  $w_s$  is the probability that the (weekly discretised) serial interval takes the value  $s$   
131 weeks. We use the notation  $\mathbf{w}$  to denote the sequence of values of  $w_s$  ( $s = 1, 2, \dots$ ).

132 The goal of the Cori method is to estimate  $R_t$ , assuming that it takes a constant value during  
133 the time period from week  $t - \tau$  to week  $t$ . In our analyses, we set  $\tau = 0$  to obtain an  
134 estimate of  $R_t$  each week, but we first present the method for general (non-negative integer  
135 value)  $\tau$  for consistency with previous presentations of this approach. If the number of cases  
136 in week  $t$  is drawn from a Poisson distribution, then the probability of observing weekly  
137 incidence  $\{I_k\}_{k=t-\tau}^t$  over the time window  $[t - \tau, t]$  (which consists of incidence data from  
138  $\tau + 1$  weeks) is

$$139 \quad \mathbb{P}(\{I_k\}_{k=t-\tau}^t | \{I_k\}_{k=1}^{t-\tau-1}, R_t, \mathbf{w}) = \prod_{k=t-\tau}^t \frac{(R_t \sum_{s=1}^{k-1} w_s I_{k-s})^{I_k} \exp(-R_t \sum_{s=1}^{k-1} w_s I_{k-s})}{I_k!}.$$

140 Assuming that the prior for  $R_t$  is a gamma distribution with shape parameter  $\alpha$  and rate  
141 parameter  $\beta$ , then, by applying Bayes' Theorem, the posterior for  $R_t$  is

$$142 \quad p(R_t | \{I_k\}_{k=1}^t, \mathbf{w}) = \text{gamma} \left( R_t, \alpha + \sum_{k=0}^{\tau} I_{t-k}, \beta + \sum_{k=0}^{\tau} \sum_{s=1}^{t-k-1} I_{t-k-s} w_s \right),$$

143 in which we use the notation  $p(R_t | \{I_k\}_{k=1}^t, \mathbf{w})$  to represent the probability density function of  
144  $R_t$  conditional on past incidence data and the weekly discretised serial interval distribution.  
145 The notation  $\text{gamma}(x, a, b)$  represents the probability density of a gamma distribution at  
146 value  $x$  with shape parameter  $a$  and rate parameter  $b$ . In all of our analyses, as in previous  
147 studies [4,5,11], we set  $\alpha = 1$  and  $\beta = 0.2$ . The prior for  $R_t$  therefore has mean and standard  
148 deviation equal to five. The large standard deviation is chosen so that the prior is relatively  
149 uninformative. The high mean ensures that the outbreak is not evaluated as being under  
150 control ( $R_t < 1$ ) unless this is very likely to be the case, so that interventions are not relaxed  
151 erroneously.

152 Throughout the manuscript, we consider estimating individual values of  $R_t$  each week, based  
153 on the numbers of new cases observed in that week. In other words, as noted above, we  
154 assume that  $\tau = 0$ , in which case the above expression simplifies to

$$155 \quad p(R_t | \{I_k\}_{k=1}^t, \mathbf{w}) = \text{gamma} \left( R_t, \alpha + I_t, \beta + \sum_{s=1}^{t-1} I_{t-s} w_s \right).$$

156 The Cori method can therefore be used to obtain a posterior for  $R_t$  for  $t \geq 2$  weeks.

### 157 Simulation-based inference of $R_t$

158 In the renewal equation model underlying the Cori method, the number of cases arising in  
159 week  $t$  depends on the numbers of cases in previous weeks. Implicit in that approach is an



160 assumption that individuals appearing in the incidence data in any week cannot generate new  
 161 cases in the same week. When disease incidence data are temporally aggregated, so that the  
 162 timescale of transmission can be shorter than the timestep in the incidence data, this  
 163 assumption may be incorrect. To relax this assumption, we consider a novel simulation-based  
 164 approach for estimating  $R_t$ . The goal of this method is again to estimate the value of  $R_t$  for  
 165 each week,  $t \geq 2$ , but using a renewal equation model with a timestep that is shorter than one  
 166 week (e.g., a daily timestep).

### 167 *Modified renewal equation*

168 In this approach, we consider partitioning the cases in each week into  $P$  timesteps, where  
 169 each new timestep is  $1/P$  weeks. If, for example,  $P = 7$ , then we are using a daily timestep in  
 170 the simulation-based method. We introduce the following notation:

- 171 •  $I_{P(t-1)+i}^{(P)}$  represents the number of cases in the  $i$ th (partitioned) timestep within week  $t$   
 172 ( $i = 1, 2, \dots, P$ ).
- 173 •  $w_s^{(P)}$  represents the probability that the serial interval, discretised into timesteps of  
 174 length  $1/P$  weeks (see below and Supplementary Material), takes the value  $s$   
 175 timesteps.
- 176 •  $\mathbf{w}^{(P)}$  represents the sequence of values of  $w_s^{(P)}$  ( $s = 1, 2, \dots$ ).

177 In forward simulations of the corresponding renewal equation model, we assume that the  
 178 number of cases in the  $i$ th timestep of week  $t$  is drawn from a Poisson distribution with mean

$$179 \quad \mathbb{E} \left( I_{P(t-1)+i}^{(P)} \mid \left\{ I_k^{(P)} \right\}_{k=1}^{P(t-1)+i-1}, R_t, \mathbf{w}^{(P)} \right) = R_t \sum_{s=1}^{P(t-1)+i-1} w_s^{(P)} I_{P(t-1)+i-s}^{(P)}$$

180 for  $i = 1, 2, \dots, P$ . This is analogous to simulating the renewal equation underlying the Cori  
 181 method but with a shorter timestep of  $1/P$  weeks (rather than with a timestep of length one  
 182 week).

## 183 *Inference of $R_t$*

184 Inference of  $R_t$  under the simulation-based method involves repeated simulation of the  
185 modified renewal equation model, using an iterative version of ABC. In short, the model is  
186 simulated repeatedly in each week  $t$ , with a different value of  $R_t$  used in each simulation  
187 (these  $R_t$  values are sampled independently from the prior, and incidence data for times  
188 before week  $t$  are sampled from matching simulations from earlier weeks). This process is  
189 repeated until a fixed number of simulations (denoted  $M$ ) have been run in which the  
190 simulated number of cases in week  $t$  exactly matches the corresponding number of cases in  
191 the data,  $I_t$ . The values of  $R_t$  used to generate the matching simulations are then combined  
192 into a posterior estimate for  $R_t$ . In all of our analyses using the simulation-based method, a  
193 value of  $M = 1000$  was used.

194 This procedure is repeated iteratively, starting with  $t = 2$ , then  $t = 3$ , and so on. Since this  
195 approach only involves obtaining matching simulations for a single week at a time, estimates  
196 of  $R_t$  can be obtained relatively quickly (compared to attempting to match an entire  
197 simulation run over multiple weeks to the real-world data, as in standard ABC rejection  
198 sampling [30]). For a more detailed description of the simulation-based inference method,  
199 including an explanation of how cases are distributed between timesteps within the first week  
200 in each simulation, see the Supplementary Material. A schematic explaining the steps  
201 involved in the inference procedure is shown in Fig S1.

## 202 Outbreak datasets

203 We consider three outbreak datasets in our analyses. We first test our approach on a simulated  
204 dataset. The use of simulated data not only enables us to compare estimates of  $R_t$  obtained  
205 using the simulation-based approach against analogous estimates using the Cori method, but

206 it also allows us to verify that the simulation-based approach for estimating  $R_t$  generates  
207 accurate estimates in a setting in which we know true value of  $R_t$  (i.e., the value used to  
208 generate the simulated dataset). We then go on to compare outputs from the simulation-based  
209 approach and the Cori method using weekly aggregated disease incidence time series for  
210 influenza from 2019-20 and 2022-23 in Wales.

### 211 *Simulated dataset (Fig 2)*

212 We generated simulated data using the modified renewal equation, using a very small  
213 timestep so that the discretised serial interval is a close approximation to the continuous serial  
214 interval. Specifically, a disease incidence time series was generated starting from one initial  
215 case (in the first timestep) using a timestep of 10 minutes ( $P = 24 \times 7 \times 6 = 1,008$ ). To  
216 generate a classic epidemic curve, the simulation was run for 11 weeks with  $R_t = 1.5$  for  $t \leq$   
217 6 weeks and  $R_t = 0.75$  for  $t > 6$  weeks.

### 218 *Influenza in Wales, 2019-20 (Figs 3,4) and 2022-23 (Figs 5,6)*

219 To demonstrate our approach on real-world data, we considered two disease incidence time  
220 series datasets provided by Public Health Wales describing estimated numbers of cases of  
221 influenza-like illness (ILI) in Wales each week. The original data comprised the clinical  
222 consultation rate per 100,000 individuals in sentinel practices in Wales each week [31]. The  
223 total number of weekly cases was then estimated by multiplying each value in the original  
224 data by 31.075 (i.e. scaling these values based on the population size of Wales, which is  
225 3,107,500 [32]). Since the dataset is for ILI, it likely contains some cases that were not  
226 influenza. Nonetheless, these data are sufficient to demonstrate and test the methods that we  
227 present in our study, and so we assume that the datasets are representative of numbers of  
228 influenza cases in Wales. Weekly data were provided from 28 October 2019 to 2 February

229 2020 (Fig 3A) and 31 October 2022 to 5 February 2023 (Fig 5A). These date ranges each  
230 span 14 weeks with high ILI burden.

### 231 Serial interval

232 Since we analyse influenza outbreak datasets in this study, we assume throughout that the  
233 (continuous) serial interval distribution is a gamma distribution with mean 0.37 weeks (2.6  
234 days) and standard deviation 0.19 weeks (1.3 days) [33]. While this estimate was derived  
235 from household data for pandemic influenza, our focus is on demonstrating the application of  
236 the simulation-based method rather than precise estimation of the serial interval, and we  
237 expect this estimate to be in line with the serial interval for seasonal influenza (i.e., a mean  
238 value of less than one week). Denoting the probability density function of the serial interval  
239 distribution by  $g(x)$ , then  $g(x) = \text{gamma}(x, 4, 10.8)$ .

240 We discretise this distribution into timesteps of length  $1/P$  weeks to obtain  $\mathbf{w}^{(P)}$ . To do this,  
241 we adapt the method used by Cori *et al.* [4] in which the serial interval distribution is  
242 discretised into timesteps of length one. Specifically, we set

$$243 \quad w_k^{(P)} = \int_{(k-1)/P}^{(k+1)/P} g(u) \left(1 - P \left|u - \frac{k}{P}\right|\right) du, \quad \text{for } k = 2, 3, 4, \dots$$

244 as derived in the Supplementary Material. We then choose  $w_1^{(P)}$  so that  $\mathbf{w}^{(P)}$  is a valid  
245 probability distribution (i.e., the sum of the entries of  $\mathbf{w}^{(P)}$  is one). The rationale for  
246 normalising  $\mathbf{w}^{(P)}$  in this way is that same-timestep cases (i.e. infectors and infectees  
247 appearing in the same timestep) are not possible in the renewal equation model. Our approach  
248 involves assigning all probability density near zero in  $g(x)$  to  $w_1^{(P)}$ , which is the shortest  
249 possible serial interval in the model.

250

## Results

### 251 Simulated dataset

252 We first considered the simulated disease incidence time series dataset in which the incidence  
253 data are aggregated into weekly counts (Fig 2A). Since this dataset was generated using a  
254 serial interval for influenza, transmission occurred on a timescale less than one week. The  
255 discretised serial interval is shown in Fig 2B, both with a weekly timestep for use with the  
256 Cori method ( $P = 1$ ; blue) and with a daily timestep for use with the simulation-based  
257 method ( $P = 7$ ; red). Since the renewal equation model underlying both the Cori method and  
258 our simulation-based approach does not allow individuals appearing in the incidence data to  
259 generate new cases in the same timestep, only the simulation-based approach allows within-  
260 week realised serial intervals.

261 We applied both  $R_t$  inference methods to the simulated dataset, finding in this scenario that  
262 the simulation-based approach generates more accurate estimates of  $R_t$  than the Cori method  
263 (Fig 2C). The percentage error in the estimated value of  $R_t$  each week using the simulation-  
264 based approach with  $P = 7$  (compared to value of  $R_t$  used to generate the dataset) is shown  
265 in Fig 2D.

266 In addition to our main analysis shown in Fig 2, we also conducted other analyses using the  
267 simulated dataset. We demonstrated that when the simulation-based method is applied with  
268  $P = 1$ , the output matches the results obtained when the Cori method is used to estimate  $R_t$   
269 (Fig S2A), as would be expected since the assumptions underlying the two methods are  
270 identical in this case. We also considered how  $R_t$  estimates obtained using the simulation-  
271 based method change when different values of  $P$  are chosen (Fig S2B-D), finding that the

272 method can obtain accurate estimates for relatively small values of  $P$  (using a value of  $P = 3$   
 273 led to similar errors compared to using  $P = 7$ ).

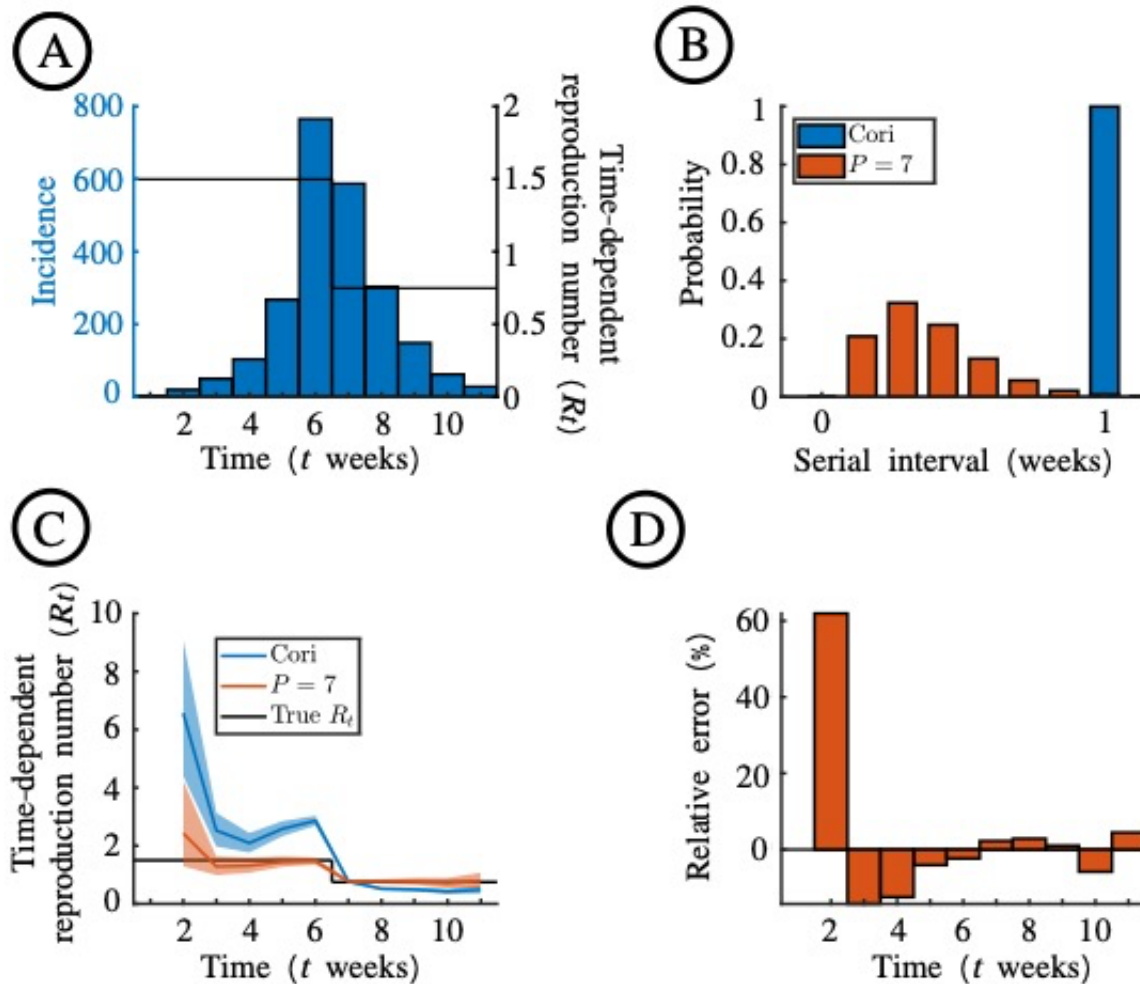

274

275 **Figure 2. Estimation of  $R_t$  from the simulated disease incidence time series dataset.** A. The simulated  
 276 outbreak dataset (blue bars), generated with  $R_t = 1.5$  for  $t \leq 6$  weeks and  $R_t = 0.75$  for  $t > 6$  weeks (black  
 277 line). The outbreak was simulated with  $P = 1,008$  starting from one initial case in the first timestep, and new  
 278 cases were then aggregated into weekly case counts. B. The discretised serial interval, for  $P = 1$  (as used with  
 279 the Cori method; blue) and  $P = 7$  (red). C. Estimates of  $R_t$  using the Cori method (blue) and the novel  
 280 simulation-based approach (with  $P = 7$ ; red). Blue and red lines are the mean estimates, and the shaded regions  
 281 represent the 95% credible intervals. The value of  $R_t$  underlying the simulation is shown in black. D. The  
 282 percentage error in the mean estimate of  $R_t$  each week (relative to the true value of  $R_t$  used to generate the  
 283 dataset) using the simulation-based method with  $P = 7$ .

284 Influenza in Wales, 2019-20 and 2022-23

285 We then went on to consider the two Wales influenza outbreak datasets, again using both the  
286 Cori and simulation-based methods to estimate  $R_t$ . First, we considered the weekly case  
287 counts from the 2019-20 influenza season (Fig 3A). As with the simulated dataset, the  
288 simulation-based approach led to different estimates of  $R_t$  than the Cori method;  $R_t$  estimates  
289 obtained using the simulation-based approach were typically lower than those from the Cori  
290 method during November and December 2019 (the simulation-based approach generally led  
291 to  $R_t$  estimates between one and two, whereas the Cori method generated estimates above  
292 two in multiple weeks), but then higher than those from the Cori method for most of January  
293 2020 when  $R_t$  was estimated to be less than one (Fig 3B). We computed the percentage error  
294 in the  $R_t$  estimate each week using the simulation-based method with  $P = 7$  (Fig 3C). Since  
295 the true underlying value of  $R_t$  was unknown, the percentage error was computed relative to  
296 applying the simulation-based method with a very large value of  $P = 168$  (this is  
297 representative of the best possible estimate of  $R_t$  obtainable from the weekly incidence data;  
298 using a partitioning value of  $P = 168$  returns inferred values of  $R_t$  estimated with a one-hour  
299 timestep). We also explored how  $R_t$  estimates depend on the value of  $P$  that is used (Fig 4).  
300 Estimates obtained using the Cori method and using the simulation-based method with  $P = 1$   
301 again matched closely (Fig 4A). We found that a value of  $P = 7$  is large enough for accurate  
302 inference of  $R_t$  (Fig 4D).

303 The analyses of the Wales influenza data from 2019-20 were then repeated for the data from  
304 2022-23, with similar results (Figs 5,6). Notably, the Cori method generally led to a higher  
305 estimate of  $R_t$  than the simulation-based method when  $R_t$  was estimated to be greater than  
306 one, and a lower estimate of  $R_t$  than the simulation-based method when  $R_t$  was estimated to  
307 be less than one (see Discussion).

308

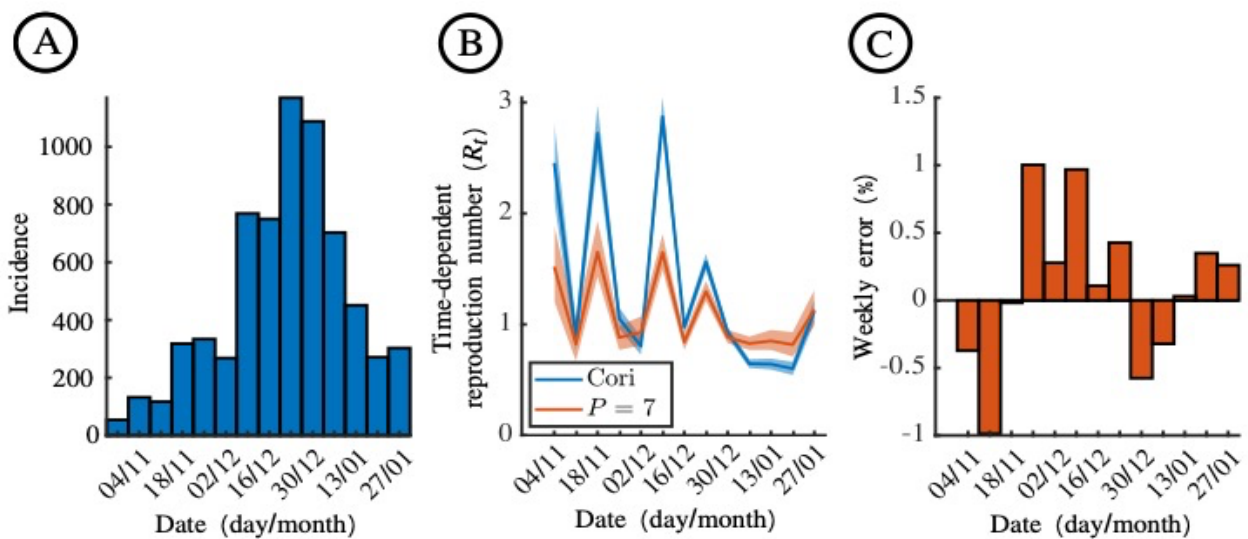

309

310 **Figure 3. Estimation of  $R_t$  for influenza in Wales, 2019-2020.** A. Weekly numbers of ILI cases in Wales from  
311 28 October 2019 to 2 February 2020, estimated from surveillance data collected in sentinel practices. B.  
312 Estimates of  $R_t$  using the Cori method (blue) and the novel simulation-based approach (with  $P = 7$ ; red). Blue  
313 and red lines are the mean estimates, and the shaded regions represent the 95% credible intervals. C. The  
314 percentage error in the mean estimate of  $R_t$  each week using the simulation-based method with  $P = 7$ ,  
315 compared to using a larger value of  $P = 168$  (which corresponds to estimating  $R_t$  with a one-hour timestep).



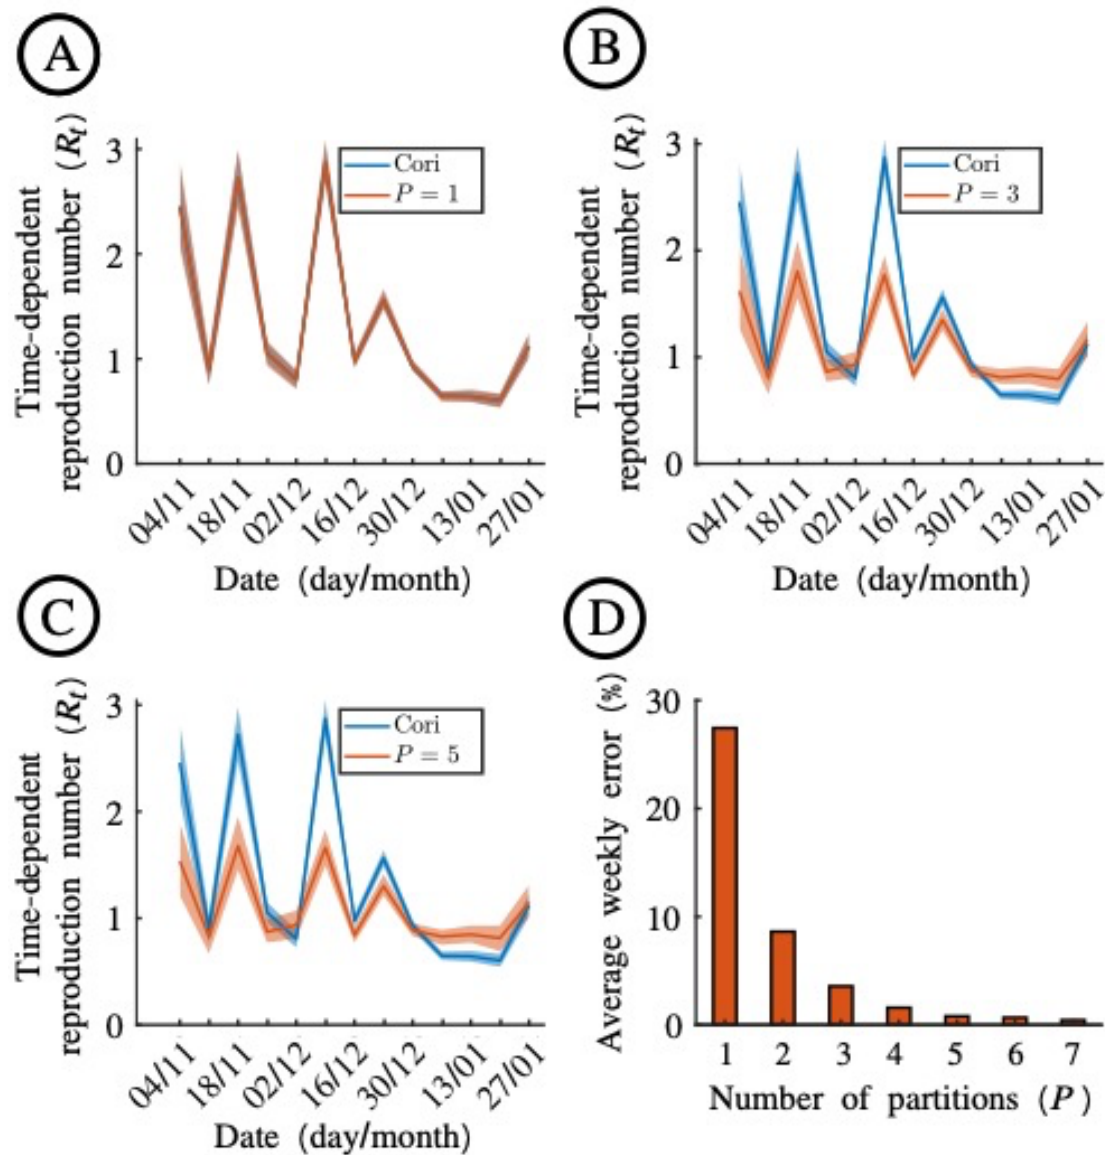

316

317 **Figure 4. Dependence of  $R_t$  estimates using the simulation-based method on the value of  $P$  used, for**  
 318 **influenza in Wales, 2019-2020.** A. Estimates of  $R_t$  obtained when the Cori method (blue) and the novel  
 319 simulation-based approach with  $P = 1$  (red) are applied to the 2019-20 influenza dataset (Fig 3A). B. Analogous  
 320 to panel A, but with  $P = 3$  in the simulation-based approach. C. Analogous to panel A, but with  $P = 5$  in the  
 321 simulation-based approach. D. The average weekly absolute error in mean  $R_t$  estimates obtained using the  
 322 simulation-based method with different values of  $P$ , compared to using a larger value of  $P = 168$  (which  
 323 corresponds to estimating  $R_t$  with a one-hour timestep). For a given value of  $P$ , this measure represents the  
 324 absolute value of the error in the estimate of  $R_t$  in week  $t$  (compared to using  $P = 168$ ), averaged over all  
 325 values of  $t$ .

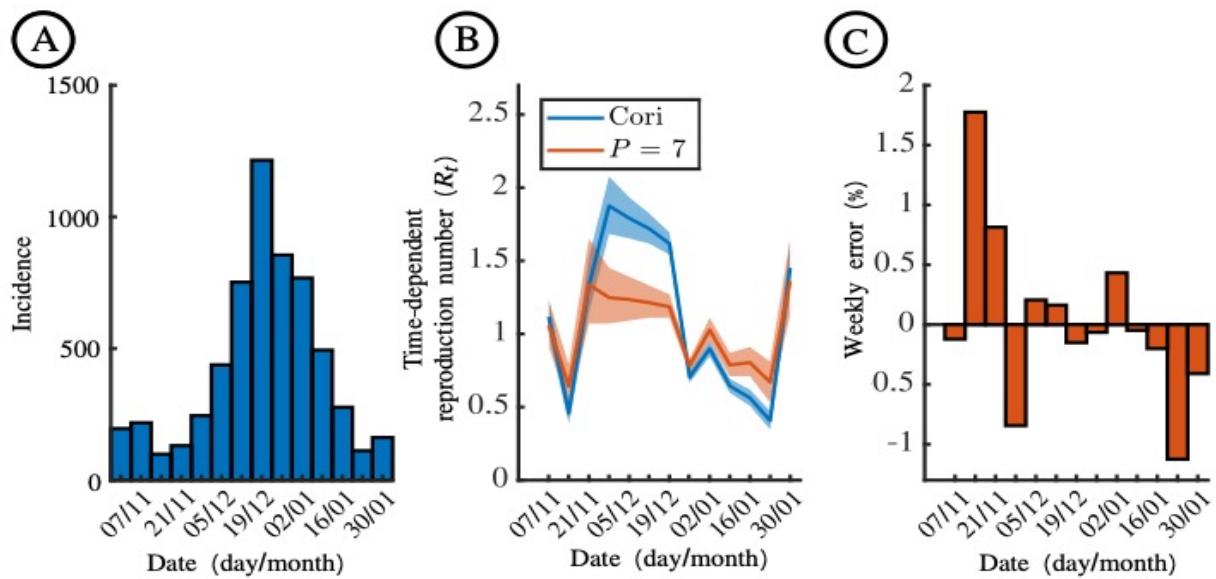

326

327 **Figure 5. Estimation of  $R_t$  for influenza in Wales, 2022-2023.** A. Weekly numbers of ILI cases in Wales from

328 31 October 2022 to 5 February 2023, estimated from surveillance data collected in sentinel practices. B.

329 Estimates of  $R_t$  using the Cori method (blue) and the novel simulation-based approach (with  $P = 7$ ; red). Blue

330 and red lines are the mean estimates, and the shaded regions represent the 95% credible intervals. C. The

331 percentage error in the mean estimate of  $R_t$  each week using the simulation-based method with  $P = 7$ ,

332 compared to using a larger value of  $P = 168$  (which corresponds to estimating  $R_t$  with a one-hour timestep).

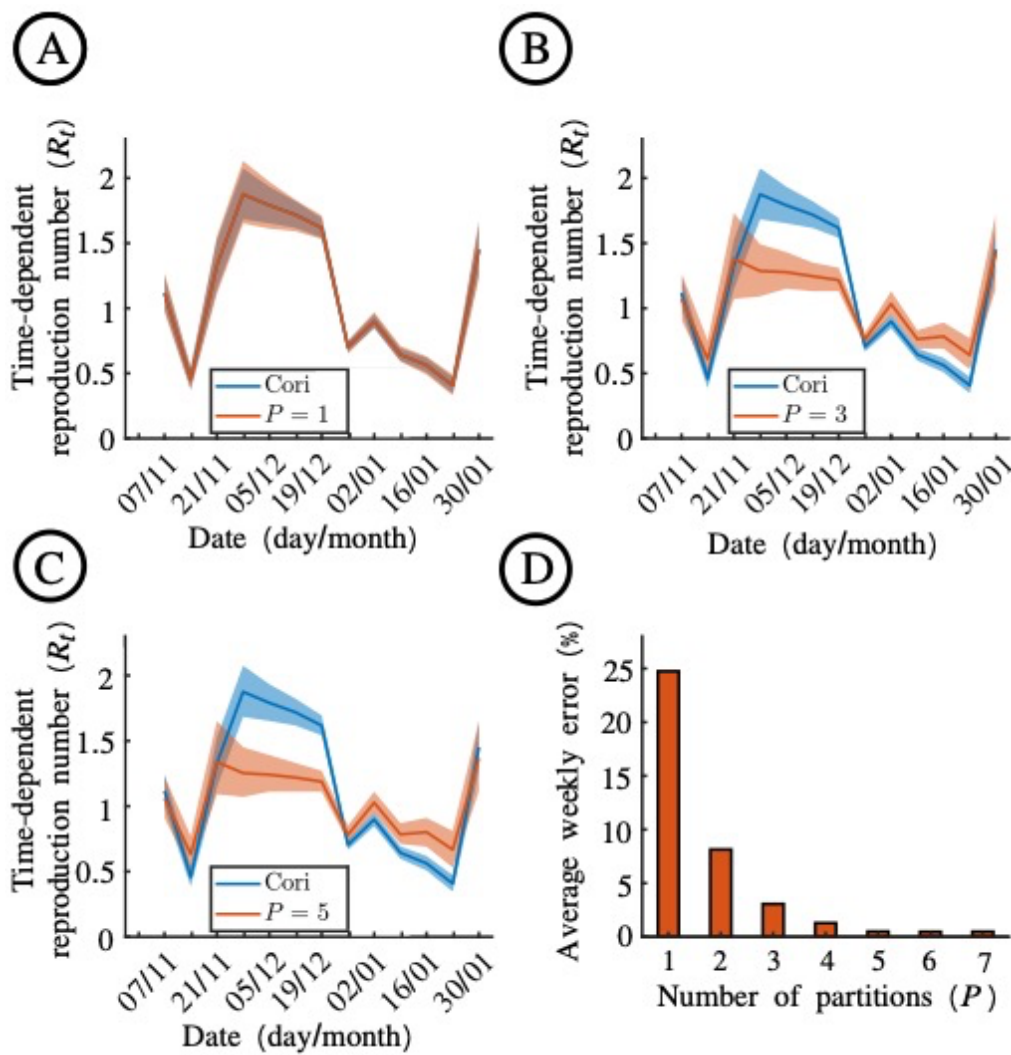

333

334 **Figure 6. Dependence of  $R_t$  estimates using the simulation-based method on the value of  $P$  used, for**

335 **influenza in Wales, 2022-2023.** A. Estimates of  $R_t$  obtained when the Cori method (blue) and the novel

336 simulation-based approach with  $P = 1$  (red) are applied to the 2022-23 influenza dataset (Fig 5A) B. Analogous

337 to panel A, but with  $P = 3$  in the simulation-based approach. C. Analogous to panel A, but with  $P = 5$  in the

338 simulation-based approach. D. The average weekly absolute error in mean  $R_t$  estimates obtained using the

339 simulation-based method with different values of  $P$ , compared to using a larger value of  $P = 168$  (which

340 corresponds to estimating  $R_t$  with a one-hour timestep). For a given value of  $P$ , this measure represents the

341 absolute value of the error in the estimate of  $R_t$  in week  $t$  (compared to using  $P = 168$ ), averaged over all

342 values of  $t$ .

343

## Discussion

344 During infectious disease outbreaks, evaluation of time-varying changes in pathogen  
345 transmission is essential to inform outbreak responses. Different metrics can be tracked,  
346 including incidence of new cases, hospitalisations and deaths, and outbreak growth rates  
347 [34,35]. A key metric that has been estimated in real-time during outbreaks of a range of  
348 pathogens is  $R_t$ , in part because of its straightforward interpretation [7,9,15]. Not only is  
349 there a threshold value of  $R_t = 1$ , below which an outbreak can be inferred as being under  
350 control, but the value of  $R_t$  also provides information about the extent to which the level of  
351 transmission must change (relative to current transmission) for an outbreak to grow or  
352 decline. For example, if  $R_t = 2$ , then more than half of transmissions must be prevented for  
353 the outbreak to decline. Similarly, if  $R_t = 0.5$ , then up to twice as many transmissions may  
354 occur before the outbreak begins to grow. Precise estimation of  $R_t$  is therefore crucial.

355 Here, we have presented a novel simulation-based approach for estimating  $R_t$  in scenarios in  
356 which disease incidence time series data are aggregated temporally (Fig 1). While  
357 epidemiological data may be collected at a fine temporal resolution, it is common for the data  
358 to then be aggregated (e.g., into weekly or monthly counts). Aggregated data may be easier to  
359 report and can be more accurate than data presented at a high temporal resolution when there  
360 is uncertainty in the precise times at which cases occurred. However, as we have shown,  
361 frequently used methods for inferring  $R_t$ , such as the Cori method [4,5], may not generate  
362 accurate estimates when applied to temporally aggregated data if transmission occurs more  
363 rapidly than the temporal resolution of the aggregated data. This is because the renewal  
364 equation model underlying the Cori method involves assuming that an individual appearing  
365 in the disease incidence time series data at timestep  $t$  cannot have infected other individuals  
366 appearing in the same timestep. Our proposed simulation-based approach addresses this, by

367 exactly matching simulations of a renewal equation model run with a shorter timestep ( $P$   
368 timesteps for each timestep in the aggregated data) to the temporally aggregated incidence  
369 data. The simulation-based approach not only provides accurate estimates of  $R_t$  (Fig 2), but  
370 can also be applied easily to real-world datasets (Figs 3-6). While using a very large value of  
371  $P$  allows the most accurate possible  $R_t$  estimates to be obtained from the aggregated data,  
372 even relatively small values of  $P$  are sufficient for  $R_t$  to be inferred accurately (Figs 4,6).

373 We found that, while the Cori method did not always provide an accurate estimate of  $R_t$  due  
374 to the temporal aggregation of the disease incidence data, it was able to identify whether or  
375 not  $R_t$  is below one (i.e., the outbreak is under control). While this is useful, as noted above  
376 precise estimation of  $R_t$  is important as it provides information about the number of  
377 transmissions that must be prevented for an outbreak to be controlled (or the number of  
378 transmissions that can occur for an outbreak to remain under control). The difference in  $R_t$   
379 estimates between the two methods can be explained by the assumption of no same-timestep  
380 cases (i.e., infectors and infectees cannot appear in the disease incidence time series in the  
381 same timestep) in the renewal equation. When the Cori method is applied to weekly data, this  
382 then leads to overestimation of the serial interval, which is known in turn to lead to  
383 overestimation of  $R_t$  if the true value of  $R_t$  is greater than one and underestimation of  $R_t$  if  
384 the true value of  $R_t$  is less than one [36,37].

385 A closely related study by Nash *et al.* [24], undertaken at the same time as the analyses  
386 presented here, has also considered estimation of  $R_t$  from temporally aggregated disease  
387 incidence time series data. In that approach, an expectation-maximisation (EM) algorithm is  
388 used to reconstruct daily incidence from any aggregation of disease incidence data using the  
389 serial interval (on a daily timescale). The original version of the Cori method is then applied  
390 to the estimated daily data. This EM approach has been integrated into the EpiEstim R

391 software package [16]. There are several differences between the approach by Nash *et al.* [24]  
392 and the simulation-based method described here. First, the two approaches are  
393 methodologically distinct, relying on entirely different underlying methods (EM or model  
394 simulation). Second, under the approach by Nash *et al.*, only a single estimated daily disease  
395 incidence time series is obtained. In contrast, our method involves matching a range of  
396 simulations to the temporally aggregated data, thereby considering different possible  
397 disaggregated disease incidence time series that could have led to the weekly aggregated data.  
398 Third, our method can be run straightforwardly for a range of values of  $P$ , allowing the most  
399 accurate possible estimates of  $R_t$  to be inferred from temporally aggregated incidence data  
400 (discretisation into a timestep of less than one day is straightforward). Fourth, our approach  
401 can be applied easily in scenarios in which the serial interval distribution is discrete rather  
402 than continuous (if, for example, the serial interval distribution is constructed directly from  
403 observations of dates on which infector-infectee pairs report symptoms). A rigorous  
404 comparison of estimated values of  $R_t$  obtained using the simulation-based method and using  
405 the EM approach of Nash *et al.* [24] is a target for future exploration. However, an initial  
406 investigation involving applying the methods to the Wales influenza datasets considered here  
407 suggests that the two approaches can obtain consistent results (Fig S3).

408 Our simulation-based method is conceptually straightforward, simply requiring repeated  
409 simulation of a renewal equation model. It is also computationally efficient to run, as  
410 simulations are only required to match the real-world data for one aggregated timestep at a  
411 time. This contrasts with using ABC rejection sampling to estimate all values of  $R_t$   
412 simultaneously, which would involve matching entire simulated time series to the entire real-  
413 world dataset. The efficiency of our approach allowed us to require that the simulations used  
414 to infer  $R_t$  match the real-world data exactly. Further computational efficiency could be  
415 achieved by removing this condition, and instead setting a threshold “distance” within which

416 a simulation is determined to match the real-world data, as is common when using ABC  
417 [30,38]. However, this necessitates that a distance metric is chosen, and resulting estimates of  
418  $R_t$  may be less accurate.

419 As in any modelling study, our framework in its current form involves assumptions. We  
420 followed previous publications in which the Cori method has been used [4,5] and assumed  
421 that the time series datasets from which we estimated  $R_t$  represent numbers of new  
422 symptomatic cases in each timestep. In the disease incidence time series data, it is then  
423 assumed that each infectee appears after their infector following a time period that reflects a  
424 random draw from the serial interval distribution, which is assumed to always take strictly  
425 positive values. However, in reality, realised serial intervals can be negative (if an infectee  
426 develops symptoms before their infector; this is possible, for example, for transmission of  
427 SARS-CoV-2 [39–42]). Rather than using disease incidence time series, it is possible to apply  
428 both the Cori method and the simulation-based method to data describing incidence of  
429 infections, replacing the serial interval distribution as an input with the distribution of the  
430 generation time (the interval between infection times in infector-infectee pairs). This can be  
431 beneficial as realised generation times are always positive. However, since times of infection  
432 are often unknown, infection incidence data are typically not observed directly. Consequently,  
433 further inference would then be required to estimate incidence of infections, as well as to  
434 estimate the generation time distribution [8,43–45].

435 In our analyses, we assumed that all cases in the disease incidence time series (after the first  
436 timestep) arose because of transmission within the population under consideration, and that  
437 all cases were recorded. In reality, some infected individuals may become infected outside the  
438 local population [5,11,46,47] and under-reporting of cases is likely for many pathogens [48–  
439 51]. Extension of our method to account for these features of real-world outbreaks is a target



440 for future research. Similarly, our method assumes that a Poisson distributed number of cases  
441 occur in each timestep of the modified renewal equation model. Considering different  
442 possible probability distributions, including accounting for the possibility of superspreading  
443 events on some days [20,21,52], is another possible area for future work.

444 Further testing of the performance of the simulation-based approach in different scenarios  
445 would also be worthwhile. For example, in settings in which disease incidence time series are  
446 subject to a “day-of-the-week effect” [53] (e.g., if cases occurring at the weekend are  
447 typically reported with a longer reporting delay than those arising during the week),  $R_t$   
448 inference using the simulation-based method applied to weekly aggregated incidence data  
449 may generate more robust estimates than attempting to infer  $R_t$  from less accurate daily  
450 incidence data. Our method can also be adapted for scenarios in which the disease incidence  
451 time series data are aggregated into timesteps that are not all of equal length. For example,  
452 when incidence data are derived from World Health Organization reports that are published  
453 irregularly in time, the timestep changes during the outbreak [54], and those irregular  
454 timesteps can be used directly in our simulation-based method.

455 In summary, we have presented a novel method for estimating  $R_t$  from temporally aggregated  
456 disease incidence time series. Going forwards, the ideal scenario is for disease incidence time  
457 series to be recorded accurately at a fine temporal resolution (e.g., daily). If that occurs, then  
458 existing methods for estimating  $R_t$  are generally expected to perform well. However, if  
459 disease incidence time series continue to be aggregated temporally for pathogens for which  
460 transmission occurs on a short timescale, then methods allowing accurate  $R_t$  inference from  
461 temporally aggregated data are of paramount importance.



462 **COMPETING INTERESTS**

463 We have no competing interests.

464 **AUTHORS' CONTRIBUTIONS**

465 IOG – formal analysis, investigation, visualisation, validation, writing – original draft,  
466 writing – review and editing.

467 WSH – methodology, writing – review and editing.

468 JS – methodology, writing – review and editing.

469 RKN – methodology, writing – review and editing.

470 JP – methodology, writing – review and editing.

471 AC – methodology, writing – review and editing.

472 EMH – methodology, supervision, visualisation, writing – review and editing.

473 RNT – conceptualization, methodology, project administration, supervision, visualisation,  
474 writing – original draft, writing – review and editing.

475 **FUNDING**

476 This research was funded by the EPSRC through the Mathematics for Real-World Systems  
477 CDT (ZO-G, RNT; grant number EP/S022244/1) and a doctoral prize (WSH; grant number  
478 EP/W524311/1). The collaboration between JS and RNT was funded by a grant from Public  
479 Health Wales. EMH and RNT would like to acknowledge the help and support of the  
480 JUNIPER partnership, funded by MRC (grant number MR/X018598/1), to which they are  
481 linked.

482 **ACKNOWLEDGEMENTS**

483 Thanks to the Communicable Disease Surveillance Centre at Public Health Wales for  
484 providing us with the data used in this research. Thanks to members of the Zeeman Institute  
485 for Systems Biology and Infectious Disease Epidemiology Research at the University of

486 Warwick, particularly Alex Kaye, and the Wolfson Centre for Mathematical Biology at the  
487 University of Oxford, for useful discussions about this work.

#### 488 **DATA AVAILABILITY**

489 The computing code used to perform the analyses in this article is available in the following  
490 GitHub repository: [www.github.com/billigitt/R\\_Estim\\_Simulation\\_Method](https://www.github.com/billigitt/R_Estim_Simulation_Method). All computer  
491 code was written in the MATLAB programming environment (compatible with version  
492 R2022a).

493

#### 494 **References**

- 495 1. Hollingsworth TD, Klinkenberg D, Heesterbeek H, Anderson RM. Mitigation strategies  
496 for pandemic influenza A: Balancing conflicting policy objectives. *PLoS Comput*  
497 *Biol.* 2011;7: e1001076–e1001076.
- 498 2. Smith RD, Keogh-Brown MR, Barnett T, Tait J. The economy-wide impact of pandemic  
499 influenza on the UK: a computable general equilibrium modelling experiment. *BMJ.*  
500 2009;339: b4571–b4571.
- 501 3. Tildesley MJ, Vassall A, Riley S, Jit M, Sandmann F, Hill EM, et al. Optimal health and  
502 economic impact of non-pharmaceutical intervention measures prior and post  
503 vaccination in England: a mathematical modelling study. *R Soc Open Sci.* 2022;9:  
504 211746.
- 505 4. Cori A, Ferguson NM, Fraser C, Cauchemez S. A new framework and software to  
506 estimate time-varying reproduction numbers during epidemics. *Am J Epidemiol.*  
507 2013;178: 1505–12.
- 508 5. Thompson RN, Stockwin JE, van Gaalen RD, Polonsky JA, Kamvar ZN, Demarsh PA, et  
509 al. Improved inference of time-varying reproduction numbers during infectious  
510 disease outbreaks. *Epidemics.* 2019;29: 100356–100356.
- 511 6. Nishiura H, Chowell G. The effective reproduction number as a prelude to statistical  
512 estimation of time-dependent epidemic trends. *Math Stat Estim App Epidem.* 2009.  
513 pp. 103–121.
- 514 7. Nash RK, Nouvellet P, Cori A. Real-time estimation of the epidemic reproduction  
515 number: Scoping review of the applications and challenges. *PLoS Digit Health.*  
516 2022;1: e0000052.

- 517 8. Gostic KM, McGough L, Baskerville E, Abbott S, Joshi K, Tedijanto C, et al. Practical  
518 considerations for measuring the effective reproductive number, Rt. *PLoS Comput*  
519 *Biol.* 2020.
- 520 9. Vegvari C, Abbott S, Ball F, Brooks-Pollock E, Challen R, Collyer BS, et al. Commentary  
521 on the use of the reproduction number R during the COVID-19 pandemic. *Stat Meth*  
522 *Med Res.* 2021;1: 1–11.
- 523 10. Thompson RN, Hollingsworth TD, Isham V, Arribas-Bel D, Ashby B, Britton T, et al.  
524 Key questions for modelling COVID-19 exit strategies. *Proc Roy Soc B.* 2020;287:  
525 20201405–20201405.
- 526 11. Creswell R, Augustin D, Bouros I, Farm HJ, Miao S, Ahern A, et al. Heterogeneity in  
527 the onwards transmission risk between local and imported cases affects practical  
528 estimates of the time-dependent reproduction number. *Phil Trans R Soc A.*  
529 2022;380: 20210308.
- 530 12. Fraser C. Estimating individual and household reproduction numbers in an  
531 emerging epidemic. *PLoS One.* 2007;2: e758.
- 532 13. Dai C, Zhou D, Gao B, Wang K. A new method for the joint estimation of  
533 instantaneous reproductive number and serial interval during epidemics. *PLoS*  
534 *Comput Biol.* 2023;19: e1011021.
- 535 14. Wallinga J, Teunis P. Different epidemic curves for severe acute respiratory  
536 syndrome reveal similar impacts of control measures. *Am J Epidemiol.* 2004;160:  
537 509–516.
- 538 15. White LF, Moser CB, Thompson RN, Pagano M. Statistical estimation of the  
539 reproductive number from case notification data. *Am J Epidem.* 2020; kwaa211.
- 540 16. EpiEstim Team. EpiEstim: Estimate time varying reproduction numbers from  
541 epidemic curves. Version 2.2-4. 2021. Available: [www.cran.r-](http://www.cran.r-project.org/web/packages/EpiEstim/)  
542 [project.org/web/packages/EpiEstim/](http://www.cran.r-project.org/web/packages/EpiEstim/)
- 543 17. EpiEstim App Team. EpiEstim App. 2019. Available:  
544 [www.shiny.dide.imperial.ac.uk/epiestim/](http://www.shiny.dide.imperial.ac.uk/epiestim/)
- 545 18. Li W, Bulekova K, Gregor B, White LF, Kolaczyk ED. Estimation of local time-varying  
546 reproduction numbers in noisy surveillance data. *Phil Trans Roy Soc A.* 2022.
- 547 19. Tsang TK, Wu P, Lau EHY, Cowling BJ. Accounting for imported cases in estimating  
548 the time-varying reproductive number of COVID-19 in Hong Kong. *J Infect Dis.*  
549 2021;224: 783–787.
- 550 20. Johnson KD, Beiglböck M, Eder M, Grass A, Hermisson J, Pammer G, et al. Disease  
551 momentum: Estimating the reproduction number in the presence of  
552 superspreading. *Infect Dis Model.* 2021;6: 706–728.

- 553 21. Ho F, Parag KV, Adam DC, Lau EHY, Cowling BJ, Tsang TK. Accounting for the  
554 potential of overdispersion in estimation of the time-varying reproduction number.  
555 *Epidemiology*. 2023;34: 201–205.
- 556 22. Bhatia S, Wardle J, Nash RK, Nouvellet P, Cori A. Extending EpiEstim to estimate the  
557 transmission advantage of pathogen variants in real-time: SARS-CoV-2 as a case-  
558 study. *Epidemics*. 2023;44: 100692.
- 559 23. Brizzi A, O’Driscoll M, Dorigatti I. Refining reproduction number estimates to  
560 account for unobserved generations of infection in emerging epidemics. *Clin Infect*  
561 *Dis*. 2022;75: e114–e121.
- 562 24. Nash RK, Bhatt S, Cori A, Nouvellet P. Estimating the epidemic reproduction  
563 number from temporally aggregated incidence data: a statistical modelling  
564 approach and software tool. *PLoS Comput Biol*. 2023;19: e1011439.
- 565 25. UK Health Security Agency. The COVID-19 dashboard moves to weekly updates.  
566 2022. Available: [www.ukhsa.blog.gov.uk/2022/06/28/the-covid-19-dashboard-](http://www.ukhsa.blog.gov.uk/2022/06/28/the-covid-19-dashboard-moves-to-weekly-updates/)  
567 [moves-to-weekly-updates/](http://www.ukhsa.blog.gov.uk/2022/06/28/the-covid-19-dashboard-moves-to-weekly-updates/)
- 568 26. UK Health Security Agency. National Influenza and COVID-19 surveillance report:  
569 Week 29 report (up to week 28 data). 2023. Available:  
570 [www.gov.uk/government/statistics/national-flu-and-covid-19-surveillance-](http://www.gov.uk/government/statistics/national-flu-and-covid-19-surveillance-reports-2022-to-2023-season)  
571 [reports-2022-to-2023-season](http://www.gov.uk/government/statistics/national-flu-and-covid-19-surveillance-reports-2022-to-2023-season)
- 572 27. Cowling BJ, Fang VJ, Riley S, Malik Peiris JS, Leung GM. Estimation of the serial  
573 interval of influenza. *Epidemiology*. 2009;20: 344–347.
- 574 28. te Beest DE, Wallinga J, Donker T, Van Boven M. Estimating the generation interval  
575 of Influenza A (H1N1) in a range of social settings. *Epidemiology*. 2013;24: 244–  
576 250.
- 577 29. Biggerstaff M, Cauchemez S, Reed C, Gambhir M, Finelli L. Estimates of the  
578 reproduction number for seasonal, pandemic, and zoonotic influenza: a systematic  
579 review of the literature. *BMC Infect Dis*. 2014;14: 480.
- 580 30. Minter A, Retkute R. Approximate Bayesian Computation for infectious disease  
581 modelling. *Epidemics*. 2019;29: 100368.
- 582 31. Public Health Wales. Weekly influenza and acute respiratory infection surveillance  
583 report: Wednesday 22nd February 2023 (covering week 07 2023). 2023. Available:  
584 [www.phw.nhs.wales/topics/immunisation-and-vaccines/flu-vaccine/weekly-](http://www.phw.nhs.wales/topics/immunisation-and-vaccines/flu-vaccine/weekly-influenza-and-acute-respiratory-infection-report/october-2022-october-2023-flu-season-202223/phw-influenza-surveillance-report-for-2023-week-7pdf/)  
585 [influenza-and-acute-respiratory-infection-report/october-2022-october-2023-flu-](http://www.phw.nhs.wales/topics/immunisation-and-vaccines/flu-vaccine/weekly-influenza-and-acute-respiratory-infection-report/october-2022-october-2023-flu-season-202223/phw-influenza-surveillance-report-for-2023-week-7pdf/)  
586 [season-202223/phw-influenza-surveillance-report-for-2023-week-7pdf/](http://www.phw.nhs.wales/topics/immunisation-and-vaccines/flu-vaccine/weekly-influenza-and-acute-respiratory-infection-report/october-2022-october-2023-flu-season-202223/phw-influenza-surveillance-report-for-2023-week-7pdf/)
- 587 32. Office for National Statistics. Population and household estimates, Wales: Census  
588 2021. 2021. Available:  
589 [www.ons.gov.uk/peoplepopulationandcommunity/populationandmigration/popul-](http://www.ons.gov.uk/peoplepopulationandcommunity/populationandmigration/populationestimates/bulletins/populationandhouseholdestimateswales/census2021)  
590 [ationestimates/bulletins/populationandhouseholdestimateswales/census2021](http://www.ons.gov.uk/peoplepopulationandcommunity/populationandmigration/populationestimates/bulletins/populationandhouseholdestimateswales/census2021)

- 591 33. Cauchemez S, Donnelly CA, Reed C, Ghani AC, Fraser C, Kent CK, et al. Household  
592 transmission of 2009 pandemic Influenza A (H1N1) virus in the United States. *N*  
593 *Engl J Med.* 2009;361: 2619–2627.
- 594 34. Pellis L, Scarabel F, Stage HB, Overton CE, Chappell LH, Fearon E, et al. Challenges in  
595 control of Covid-19: short doubling time and long delay to effect of interventions.  
596 *Phil Trans Roy Soc B.* 2021;376: 20200264–20200264.
- 597 35. Parag KV, Thompson RN, Donnelly CA. Are epidemic growth rates more informative  
598 than reproduction numbers? *J R Stat Soc Ser A.* 2022;1: 1–11.
- 599 36. Wallinga J, Lipsitch M. How generation intervals shape the relationship between  
600 growth rates and reproductive numbers. *Proc R Soc B Biol Sci.* 2007;274: 599–604.
- 601 37. Knight J, Mishra S. Estimating effective reproduction number using generation time  
602 versus serial interval, with application to COVID-19 in the Greater Toronto Area,  
603 Canada. *Infect Dis Model.* 2020;5: 889–896.
- 604 38. Toni T, Welch D, Strelkova N, Ipsen A, Stumpf MPH. Approximate Bayesian  
605 computation scheme for parameter inference and model selection in dynamical  
606 systems. *J R Soc Interface.* 2009;6: 187–202.
- 607 39. Du Z, Xu X, Wu Y, Wang L, Cowling BJ, Meyers LA. Serial interval of COVID-19 among  
608 publicly reported confirmed cases. *Emerg Infect Dis.* 2020;26: 1341–1343.
- 609 40. Hart WS, Maini PK, Thompson RN. High infectiousness immediately before COVID-  
610 19 symptom onset highlights the importance of continued contact tracing. *eLife.*  
611 2021;10: e65534.
- 612 41. Geismar C, Nguyen V, Fragaszy E, Shrotri M, Navaratnam AMD, Beale S, et al.  
613 Bayesian reconstruction of SARS-CoV-2 transmissions highlights substantial  
614 proportion of negative serial intervals. *Epidemics.* 2023;44: 100713.
- 615 42. Madewell ZJ, Yang Y, Longini IM, Halloran ME, Vespignani A, Dean NE. Rapid review  
616 and meta-analysis of serial intervals for SARS-CoV-2 Delta and Omicron variants.  
617 *BMC Infect Dis.* 2023;23: 429.
- 618 43. Abbott S, Hellewell J, Thompson RN, Sherratt K, Gibbs HP, Bosse NI, et al. Estimating  
619 the time-varying reproduction number of SARS-CoV-2 using national and  
620 subnational case counts. *Wellcome Open Res.* 2020;5: 112.
- 621 44. Hart WS, Abbott S, Endo A, Hellewell J, Miller E, Andrews N, et al. Inference of the  
622 SARS-CoV-2 generation time using UK household data. *eLife.* 2022;11: e70767.
- 623 45. Hart WS, Miller E, Andrews NJ, Waight P, Maini PK, Funk S, et al. Generation time of  
624 the alpha and delta SARS-CoV-2 variants: an epidemiological analysis. *Lancet Inf*  
625 *Dis.* 2022;22: 603–610.
- 626 46. Daon Y, Thompson RN, Obolski U. Estimating COVID-19 outbreak risk through air  
627 travel. *J Travel Med.* 2020;27: taaa093.

- 628 47. Didelot X, Helekal D, Kendall M, Ribeca P. Distinguishing imported cases from  
629 locally acquired cases within a geographically limited genomic sample of an  
630 infectious disease. *Bioinformatics*. 2023;39: btac761.
- 631 48. Dalziel BD, Lau MSY, Tiffany A, McClelland A, Zelner J, Bliss JR, et al. Unreported  
632 cases in the 2014-2016 Ebola epidemic: Spatiotemporal variation, and implications  
633 for estimating transmission. Althouse B, editor. *PLoS Negl Trop Dis*. 2018;12:  
634 e0006161.
- 635 49. Albani V, Loria J, Massad E, Zubelli J. COVID-19 underreporting and its impact on  
636 vaccination strategies. *BMC Infect Dis*. 2021;21: 1111.
- 637 50. Gibbons CL, Mangan M-JJ, Plass D, Havelaar AH, Brooke RJ, Kramarz P, et al.  
638 Measuring underreporting and under-ascertainment in infectious disease datasets:  
639 a comparison of methods. *BMC Public Health*. 2014;14: 147.
- 640 51. Lovell-Read FA, Funk S, Obolski U, Donnelly CA, Thompson RN. Interventions  
641 targeting non-symptomatic cases can be important to prevent local outbreaks:  
642 SARS-CoV-2 as a case study. *J R Soc Interface*. 2021;18: 20201014.
- 643 52. Bradbury NV, Hart WS, Lovell-Read FA, Polonsky JA, Thompson RN. Exact  
644 calculation of end-of-outbreak probabilities using contact tracing data. *medRxiv*.  
645 2023.
- 646 53. Guzmán-Rincón LM, Hill EM, Dyson L, Tildesley MJ, Keeling MJ. Bayesian estimation  
647 of real-time epidemic growth rates using Gaussian processes: local dynamics of  
648 SARS-CoV-2 in England. *J R Stat Soc C*. 2023;00: 1–22.
- 649 54. Shaman J, Yang W, Kandula S. Inference and forecast of the current West African  
650 Ebola outbreak in Guinea, Sierra Leone and Liberia. *PLoS Curr*. 2014;1: 6.
- 651
