# Supplementary material for: A simulation-based approach for estimating the time-dependent reproduction number from temporally aggregated disease incidence time series data
Source: bioRxiv or medRxiv preprint supplement (doi:10.1101/2023.09.13.23295471), 2023-09-14
Supplement: Supplementary file [file media-1.pdf]

1 **Supplementary Material for *A simulation-based approach for estimating the time-dependent***  
2 ***reproduction number from temporally aggregated disease incidence time series data***

3 I Ogi-Gittins<sup>1,2</sup>, WS Hart<sup>3</sup>, J Song<sup>4</sup>, RK Nash<sup>5</sup>, J Polonsky<sup>6</sup>, A Cori<sup>5</sup>, EM Hill<sup>1,2</sup>, RN Thompson<sup>3</sup>

4 **Affiliations:**

5 <sup>1</sup>Mathematics Institute, University of Warwick, Coventry, CV4 7AL, UK

6 <sup>2</sup>Zeeman Institute for Systems Biology and Infectious Disease Epidemiology Research (SBIDER),  
7 University of Warwick, Coventry, CV4 7AL, UK

8 <sup>3</sup>Mathematical Institute, University of Oxford, Oxford, OX2 6GG, UK

9 <sup>4</sup>Communicable Disease Surveillance Centre, Health Protection Division, Public Health Wales,  
10 Swansea, SA2 8QA, UK

11 <sup>5</sup>MRC Centre for Global Infectious Disease Analysis, School of Public Health, Imperial College,  
12 London, W2 1PG, UK

13 <sup>6</sup>Geneva Centre of Humanitarian Studies, University of Geneva, Geneva, 1205, Switzerland

14  
15 **Supplementary Text**

16 **Discretisation of the serial interval**

17 Here, we explain how a continuous serial interval distribution (with probability density  
18 function  $g(x)$ ) can be discretised into timesteps of length  $1/P$  weeks to obtain  $w_s^{(P)}$  ( $s =$   
19  $1, 2, \dots$ ) and  $\mathbf{w}^{(P)}$ . The notation  $w_s^{(P)}$  represents the probability that the serial interval,  
20 discretised into timesteps of length  $1/P$ , takes the value  $s$  timesteps, and  $\mathbf{w}^{(P)}$  is the sequence  
21 of values of  $w_s^{(P)}$ . We adapt the approach described by Cori *et al.* [1] (see web appendix 11 in

22 the Supplementary Data of that article) in which the serial interval is discretised into  
 23 timesteps of length one.

24 We consider an infector-infectee transmission pair and assume that the precise time at which  
 25 the infector develops symptoms is uniformly distributed within the timestep in which they  
 26 appear in the disease incidence time series data. If the continuous serial interval takes the  
 27 value  $u$  weeks, then the probability that the infectee arises in the disease incidence time series  
 28 data  $k \geq 2$  timesteps after their infector is given by

$$29 \quad \mathbb{P}(\text{discrete SI} = k \mid \text{cts SI} = u) = \begin{cases} 1 - P \left| u - \frac{k}{P} \right|, & \text{if } \frac{k-1}{P} < u < \frac{k+1}{P}, \\ 0, & \text{otherwise.} \end{cases}$$

30 Then, conditioning on the unknown value of the continuous serial interval gives

$$31 \quad w_k^{(P)} = \int_0^{\infty} \mathbb{P}(\text{discrete SI} = k \mid \text{cts SI} = u) \times g(u) du,$$

$$32 \quad = \int_{(k-1)/P}^{(k+1)/P} \left( 1 - P \left| u - \frac{k}{P} \right| \right) g(u) du,$$

33 in which  $g(u)$  is the probability density function of the continuous serial interval distribution.

34 In principle, the calculation above can be applied when  $k = 1$ , and a similar argument can be  
 35 used to obtain the probability that an infectee appears in the disease incidence time series in  
 36 the same timestep as their infector (which would correspond to  $w_0^{(P)}$ ). However, since the  
 37 renewal equation model requires all new cases in a given timestep to have been infected by  
 38 infectors appearing in the incidence data at a strictly earlier timestep, rather than the same  
 39 timestep, we neglect  $w_0^{(P)}$  and instead assume that same timestep cases are absorbed into  
 40  $w_1^{(P)}$ . In other words, we simply set  $w_1^{(P)}$  so that  $\mathbf{w}^{(P)}$  sums to one.

41 When we apply the Cori method, we require the continuous serial interval distribution to be  
42 discretised into weekly timesteps. This therefore corresponds to undertaking the above  
43 calculations with  $P = 1$ .

#### 44 **Simulation-based inference of $R_t$**

45 Here, we give further details about the simulation-based method. The value of  $R_t$  (for  $t \geq 2$ )  
46 is estimated iteratively: in other words,  $R_2$  is estimated first, followed by  $R_3$ , and so on. By  
47 estimating  $R_t$  iteratively, our inference procedure can be performed more quickly than  
48 attempting to estimate  $R_t$  for all values of  $t \geq 2$  simultaneously (as in standard ABC  
49 rejection sampling [2]).

50 To estimate  $R_t$  (for  $t \geq 2$ ) from a weekly disease incidence time series dataset, we consider  
51 running simulations of the modified renewal equation model in which each week is divided  
52 into  $P$  timesteps (each of timestep  $1/P$  weeks). The value  $P = 7$  therefore corresponds to a  
53 daily timestep, however the simulation-based method can be run for any positive integer  
54 value of  $P$  (with larger values of  $P$  leading to the most accurate possible estimates of  $R_t$   
55 obtainable from the weekly aggregated disease incidence time series).

56 To estimate  $R_2$ , we repeatedly simulate the modified renewal equation up until the end of the  
57 second week, storing “matching” simulations (those simulations in which the number of  
58 cases in the second week in the simulation exactly matches the number of cases in the second  
59 week in the time series dataset). In each simulation, we: i) sample the value of  $R_2$  from the  
60 (time-homogeneous) prior for  $R_t$ ; ii) assign each case in the first week of the dataset to one of  
61 the  $P$  timesteps in the first week (chosen uniformly at random). New simulations are  
62 generated until  $M$  simulations that match the number of cases in the second week of the  
63 dataset have been obtained. For each matching simulation, we store both the sampled value of  
64  $R_2$  and the corresponding numbers of cases in each timestep in that simulation,  $\{I_i^{(P)}\}_{i=1}^{2P}$ . The

65 values of  $R_2$  from the matching simulations can be combined to construct the posterior  
66 distribution for  $R_2$ .

67 We then estimate  $R_t$  for each  $t \geq 3$  in turn. To do this, we again run simulations of the  
68 modified renewal equation model, but starting from the beginning of week  $t$  (this  
69 corresponds to timestep  $P(t - 1) + 1$  in the modified renewal equation model). Each  
70 simulation is run until the end of week  $t$  (i.e. up to and including timestep  $Pt$ ). In each  
71 simulation, we: i) sample the value of  $R_t$  from the prior; ii) choose past incidence uniformly  
72 at random out of the matching sets stored when estimating  $R_{t-1}$ . New simulations are  
73 generated until  $M$  simulations that match the number of cases in week  $t$  of the dataset have  
74 been obtained. For each matching simulation, we store both the sampled value of  $R_t$  and the  
75 corresponding numbers of cases in each timestep in that simulation (including the sampled  
76 past disease incidence used in that simulation),  $\{I_i^{(P)}\}_{i=1}^{Pt}$ . The values of  $R_t$  from the matching  
77 simulations can be combined to construct the posterior distribution for  $R_t$ .

78 In all of our analyses, we required simulations that match the disease incidence time series  
79 data in week  $t$  to have exactly the correct number of cases in that week. For improved  
80 computational efficiency, this algorithm could be adapted so that the number of cases in week  
81  $t$  in matching simulations is within some tolerance level of the corresponding number of  
82 cases in the real-world data. However, we did not use that approach here as it would lead to  
83 less accurate estimates of  $R_t$ , and we found that our computing code ran sufficiently quickly  
84 for results to be obtained without this adaptation.

85

## Supplementary Figures

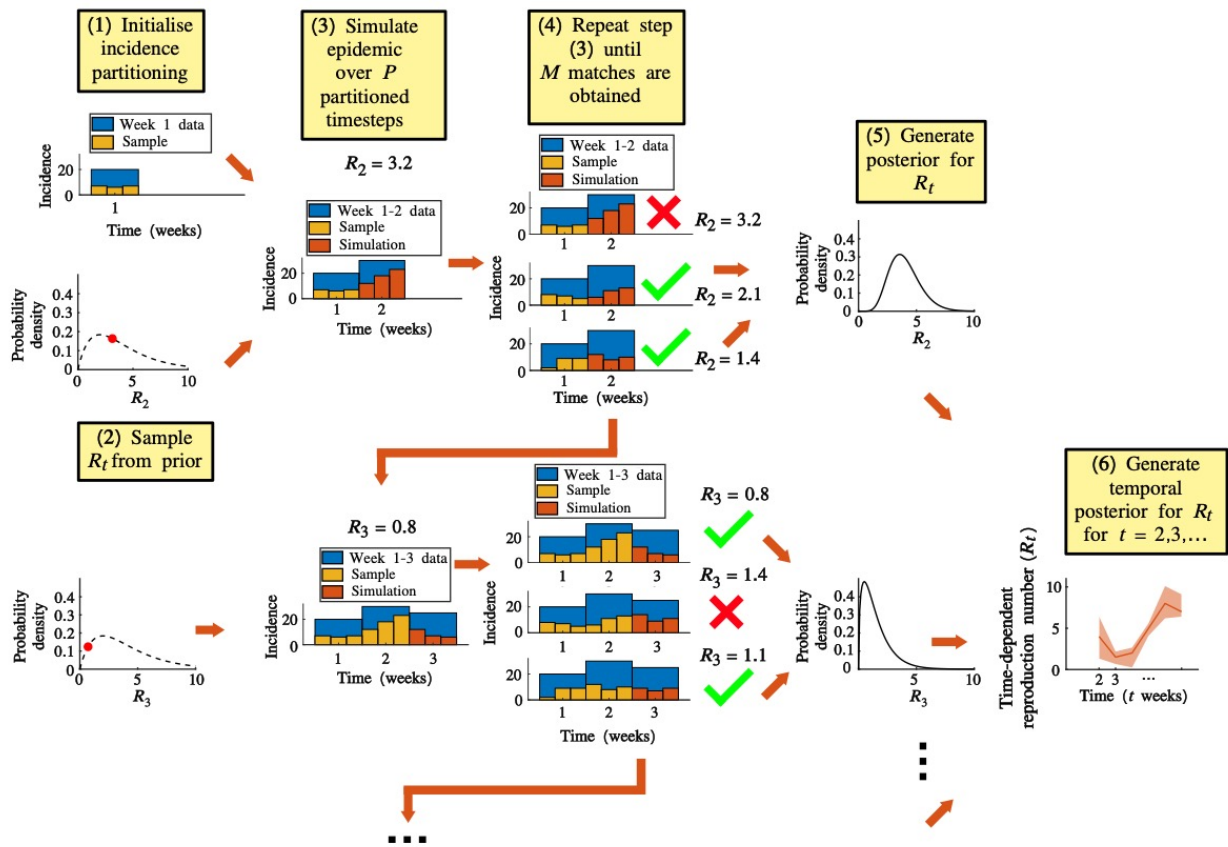

87

88 **Fig S1. Schematic illustrating the steps involved in the simulation-based method for inferring  $R_t$ .** The  
 89 procedure involves six steps: (1) Initialise the incidence partitioning for the first aggregated timestep ( $t = 1$ ).  
 90 Each case in the first aggregated timestep is assigned uniformly at random to one of the  $P$  partitions in that  
 91 aggregated timestep; (2) Sample the value of  $R_2$  from the prior; (3) Use the partitioned incidence from step 1  
 92 and the  $R_2$  value from step 2 to simulate the partitioned incidence in week  $t = 2$  using the modified renewal  
 93 equation. (4) Repeat steps 1-3 until a pre-specified number of simulations,  $M$ , have been generated in which the  
 94 simulated number of cases in week  $t = 2$  match the corresponding number of cases in the disease incidence  
 95 data. (5) Use the sampled values of  $R_2$  from the matching simulations to construct the posterior distribution for  
 96  $R_2$ . These steps are then repeated iteratively to estimate  $R_t$  in each of weeks  $t = 3, 4, 5 \dots$ . For these values of  $t$ ,  
 97 in each simulation, the value of  $R_t$  is sampled from the prior, and step 1 is replaced so that past disease  
 98 incidence for times up to (and including) week  $t - 1$  are sampled from the matching simulations obtained when  
 99 estimating  $R_{t-1}$ . (6) Plot the posterior distributions for  $R_t$  ( $t = 2, 3, 4 \dots$ ) to observe temporal changes in  
 100 transmissibility during the outbreak.

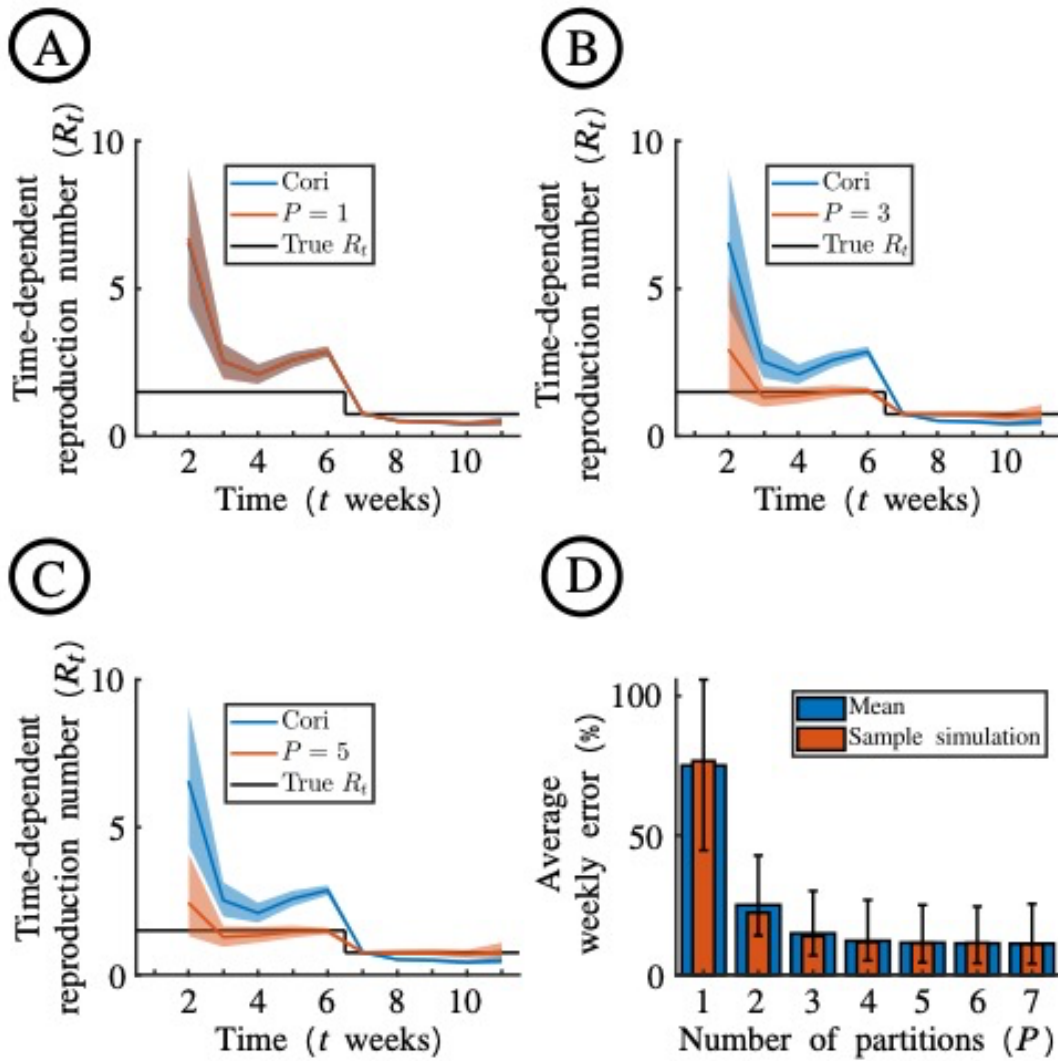

102

103 **Fig S2. Dependence of  $R_t$  estimates using the simulation-based method on the value of  $P$  used, for the**104 **simulated disease incidence time series dataset.** A. Estimates of  $R_t$  obtained when the Cori method (blue) and105 the novel simulation-based approach with  $P = 1$  (red) are applied to the simulated disease incidence time series106 dataset (Fig 2A in the main text). B. Analogous to panel A, but with  $P = 3$  in the simulation-based approach. C.107 Analogous to panel A, but with  $P = 5$  in the simulation-based approach. D. The average weekly absolute error108 in mean  $R_t$  estimates obtained using the simulation-based method with different values of  $P$ , compared to the109 true underlying value of  $R_t$ . For a given value of  $P$ , this measure represents the absolute value of the error in the110 estimate of  $R_t$  in week  $t$  (compared to the true value of  $R_t$ ), averaged over all values of  $t$ . Red bars are for the

111 simulated dataset shown in Fig 2A of the main text. Blue bars are the average weekly absolute error averaged

112 over each of 100 simulated datasets that were generated in an identical fashion to the simulated dataset in Fig

113 2A of the main text. Error bars show the 95% credible interval across the 100 simulations.

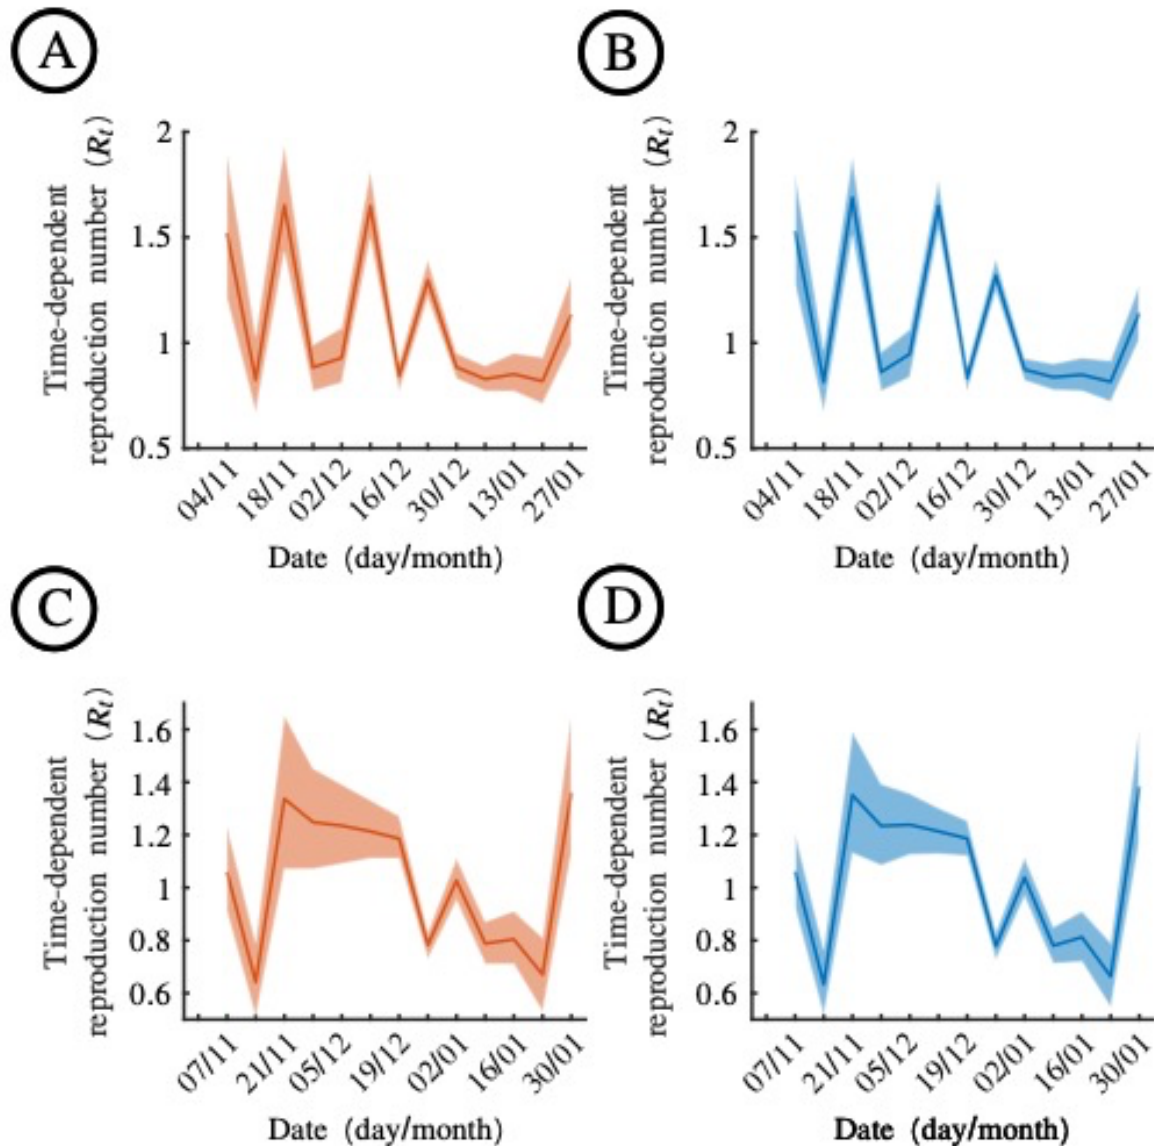

115

116 **Fig S3. Comparison of  $R_t$  estimates obtained using our simulation-based approach with analogous**  
 117 **estimates using the Expectation-Maximisation (EM) approach developed by Nash *et al.* [3]. A. Estimates of**  
 118  **$R_t$  obtained when the simulation-based approach with  $P = 7$  is applied to the 2019-20 Wales influenza dataset**  
 119 **(Fig 3A). B. Analogous results to panel A, but using the EM approach. C. Estimates of  $R_t$  obtained when the**  
 120 **simulation-based approach with  $P = 7$  is applied to the 2022-23 Wales influenza dataset (Fig 5A). B.**  
 121 **Analogous results to panel C, but using the EM approach. Blue and red lines are the mean estimates, and the**  
 122 **shaded regions represent 95% credible intervals. These results indicate that the simulation-based and EM**  
 123 **approaches generate consistent results.**

124

125 **References**

- 126 1. Cori A, Ferguson NM, Fraser C, Cauchemez S. A new framework and software to  
127 estimate time-varying reproduction numbers during epidemics. *Am J Epidemiol.*  
128 2013;178: 1505–12.
- 129 2. Minter A, Retkute R. Approximate Bayesian Computation for infectious disease  
130 modelling. *Epidemics.* 2019;29: 100368.
- 131 3. Nash RK, Bhatt S, Cori A, Nouvellet P. Estimating the epidemic reproduction number  
132 from temporally aggregated incidence data: a statistical modelling approach and software  
133 tool. *PLoS Comput Biol.* 2023;19: e1011439.

134
